# Supplementary material for: Novel intermolecular carbon radical addition to a nitrone: asymmetric synthesis of α-amino acidsElectronic supplementary information (ESI) available: experimental procedures. See http://www.rsc.org/suppdata/cc/b2/b211570k/
Source: Royal Society of Chemistry journal article supplement (doi:10.1039/b211570k), 2003-01-14
Supplement: b211570k.doc [file b211570k.doc]

**Electronic Supplementary Information**

**Novel Intermolecular Carbon Radical Addition to Nitrone:**

**The Asymmetric Synthesis of -Amino Acids**

Masafumi Ueda, Hideto Miyabe, Masako Teramachi, Okiko Miyata, and Takeaki Naito*

The chiral glyoxylic nitrone **1** was easily prepared from the commercially available *tert*-butyl (2*S*,3*R*)-(+)-6-oxo-2,3-diphenyl-4-morpholinecarboxylate **I** (Scheme 1). Treatment of *tert*-BOC derivative **I** with TFA gave 5,6-diphenylmorpholin-2-one**II**1 in 83% yield. Next, the Oxidation of secondary amine catalyzed methyltrioxorhenium(VII) (MTO) with urea-hydrogen peroxide complex (UHP) was effective for preparing the conjugated nitrone **1**.2

**Preparation of 5,6-diphenylmorpholin-2-one II.**1

To a solution of *tert*-butyl (2*S*,3*R*)-(+)-6-oxo-2,3-diphenyl-4-morpholinecarboxylate **I** (2.56 g, 7.25 mmol) in CH2Cl2 (170 mL) was added TFA (11.5 mL) under a nitrogen atmosphere at 20 °C. After being stirred at the same temperature for 3 h, Et3N (3.15 mL) was added to the reaction mixture. After being stirred at the same temperature for 20 min, the solvent was evaporated at reduced pressure. The resulting residue was diluted with AcOEt and washed withwater. The organic phase was dried over MgSO4 and concentrated at reduced pressure. Purification of the residue by recrystallization (hexane/AcOEt) afforded **II** (1.52 g, 83%) as a white solid. 1H NMR (CDCl3)  7.26-7.14 (6H, m), 6.92 (2H, m), 6.81 (2H, m), 5.67 (1H, d, *J*=4.0 Hz), 4.62 (1H, d, *J*=4.0 Hz), 4.10 (1H, d, *J*=18.5 Hz), 4.03 (1H, d, *J*=18.5 Hz). 13C NMR (CDCl3)  168.0, 136.9, 134.6, 128.3, 128.2, 128.1, 127.6, 127.3, 127.2, 84.7, 60.4, 48.8. HRMS Calcd for C16H15NO2 (M+) 253.1102, Found 253.1121. []D30 –279.6 (*c* 1.01, CHCl3).

**Preparation of nitrone 1.**2

A suspension of methyltrioxorhenium(VII) (MTO) (4 mg, 0.016 mmol) and urea-hydrogen peroxide complex (UHP) (223 g, 2.23 mmol) in MeOH (1.6 mL) was stirred under a nitrogen atmosphere at 20 °C for 10 min. To this suspension was added secondary amine **II** (200 mg, 0.79 mmol) at 0 °C. After being stirred at 20 °C for 24 h, the solvent was evaporated at reduced pressure. After the resulting residue was diluted with CH2Cl2, the organic phase was filtered and the filtrate was concentrated at reduced pressure. Purification of the residue by medium-pressure column chromatography (hexane/AcOEt 2:1) afforded **1** (166.2 mg, 79%) as a white solid. 1H NMR (CDCl3)  7.50 (1H, s), 7.34-7.20 (6H, m), 7.06 (2H, m), 6.93 (2H, m), 6.08 (1H, d, *J*=3.5 Hz), 5.10 (1H, d, *J*=3.5 Hz). 13C NMR (CDCl3)  159.2, 132.2, 129.9, 129.2, 128.8, 128.7, 128.6, 128.0, 126.1, 125.2, 79.0, 78.0. HRMS Calcd for C16H13NO3 (M+) 267.0895, Found 267.0902. []D29 +743.7 (*c* 1.00, CHCl3).

**Ethyl radical addition to nitrone 1 (Table 1, entries 1-3).**

To a solution of nitrone **1** (50 mg, 0.19 mmol) in CH2Cl2 or benzene (5 mL) was added Et3B (1.0 M in hexane, 0.94 mL, 0.94 mmol) at –78 °C, +20 °C or reflux. After being stirred at the same temperature for 2 h, the reaction mixture was concentrated at reduced pressure. Purification of the residue by preparative TLC (hexane/AcOEt 3:1, 2-fold developments) afforded the desired ethylated product **2a**, the diethylated product **3a**, and the ethylated nitrone **4a** as white solids, respectively.

**Ethyl radical addition to nitrone 1 using Bu3SnH (Table 1, entries 4 and 5).**

To a solution of nitrone **1** (50 mg, 0.19 mmol) in CH2Cl2 (5 mL) were added Bu3SnH (0.060 mL, 0.23 mmol) and Et3B (1.0 M in hexane, 0.94 mL, 0.94 mmol) at +20 °C or –78 °C. After being stirred at the same temperature for 2 h, the reaction mixture was concentrated at reduced pressure. Purification of the residue by preparative TLC (hexane/AcOEt 3:1, 3-fold developments) afforded the desired ethylated product **2a**, the diethylated product **3a**, and the ethylated nitrone **4a** all as white solids, respectively.

**Ethylated product 2a.** 1H NMR (CDCl3)  7.32-7.14 (10H, m), 6.17 (1H, d, *J*=3.5 Hz), 4.95 (1H, br s), 4.85 (1H, d, *J*=3.5 Hz), 3.60 (1H, t, *J*=4.5 Hz), 2.15-2.00 (2H, m), 1.05 (3H, t, *J*=7.5 Hz). 13C NMR (CDCl3)  170.5,135.8, 131.4, 130.7, 128.4, 128.3 (x 2), 127.7, 125.4, 78.6, 68.7, 64.3, 22.0, 9.6. HRMS Calcd for C18H19NO3 (M+) 297.1364, Found 297.1364. []D26 –7.0 (*c* 1.00, CHCl3).

**Diethylated product 3a.** 1H NMR (CDCl3)  7.35-7.14 (10H, m), 6.16 (1H, br d, *J*=3.5 Hz), 4.86 (1H, d, *J*=3.5 Hz), 4.04-3.90 (2H, m), 3.56 (1H, t, *J*=4.5 Hz), 2.03 (2H, m), 1.26 (3H, t, *J*=7.5 Hz), 1.06 (3H, t, *J*=7.0 Hz),. 13C NMR (CDCl3)  170.8, 136.0, 132.1, 130.7, 128.3, 128.1 (x 2), 127.6, 125.4, 78.8, 68.4, 65.6, 63.4, 21.9, 14.1, 9.8. HRMS Calcd for C20H23NO3 (M+) 325.1676, Found 325.1688. []D29 –59.1 (*c* 1.10, CHCl3).

**Ethylated nitrone 4a.** 1H NMR (CDCl3)  7.32-7.15 (6H, m), 7.03 (2H, m), 6.82 (2H, m), 6.05 (1H, d, *J*=3.3 Hz), 5.15 (1H, d, *J*=3.3 Hz), 3.02-2.80 (2H, m), 1.26 (3H, t, *J*=7.5 Hz). 13C NMR (CDCl3)  159.6, 140.6, 132.5, 129.4, 129.2, 128.9, 128.5, 128.3, 127.6, 126.0, 78.1, 77.2, 19.1, 9.1. HRMS Calcd for C18H17NO3 (M+) 295.1207, Found 295.1222. []D27 +573.0 (*c* 1.01, CHCl3).

**Synthesis of **Cbz-amino acid 5.**

To a solution of ethylated product **2a** (121 mg, 0.41 mmol) in H2O (0.3 mL) and MeCN (4 mL) was added Mo(CO)6 (75 mg, 0.29 mmol) under a nitrogen atmosphere at 20 °C. After being heated at reflux for 2 h, the reaction mixture was concentrated at reduced pressure. The resulting residue was diluted with CH2Cl2 and washed withsaturated aqueous NaHCO3 and water. The organic phase was dried over MgSO4 and concentrated at reduced pressure. Purification of the residue by preparative TLC (hexane/AcOEt 3:1) afforded the secondary amine (96 mg, 84%) as a white solid. After characterization by NMR, the secondary amine was immediately subjected to the following reaction.

A suspension of 20% Pd(OH)2 (100 mg) in MeOH (10 mL) was stirred under a hydrogen atmosphere at 20 °C for 30 min. To this suspension was added a solution of the secondary amine (96 mg, 0.34 mmol) in MeOH (5 mL). After being stirred under a hydrogen atmosphere at the same temperature for 2 h, the reaction mixture was filtered and the filtrate was concentrated at reduced pressure to afford the crude amine. To a solution of the resulting crude amine in acetone (4 mL) was added a solution of Na2CO3 (72 mg, 0.68 mmol) in H2O (1 mL) under a nitrogen atmosphere at 20 °C. After CbzCl (116 mg, 0.68 mmol) was added at 0 °C, the reaction mixture was stirred at 20 °C for 16 h. After the reaction mixture was concentrated at reduced pressure, the resulting residue was acidified to pH 2 with 1 N HCl, and then extracted with CH2Cl2. The organic phase was dried over MgSO4 and concentrated at reduced pressure. Purification of the residue by preparative TLC (CHCl3/MeOH 30:1) afforded the -amino acid **5** (31 mg, 38%) as a white solid.

**5.** The presence of rotamers precluded a comprehensive assignment of all proton resonances. 1H NMR (CDCl3)  7.45-7.25 (5H, m), 5.41 (1H, br s), 5.09 (2H, br m), 4.32 (1H, br m), 4.23 (1H, br s), 2.00-1.60 (2H, br m), 0.94 (3H, br m). 13C NMR (CDCl3)  177.2, 156.1, 136.0, 128.4, 128.1, 128.0, 67.0, 55.0, 25.4, 9.4. HRMS Calcd for C12H15NO4 (M+) 237.1000, Found 237.1004. []D21 +11.3 (*c* 1.82, EtOH). [lit.2 []D26 +9.3 (*c* 2.0, EtOH).]

**Isopropyl radical addition to nitrone 1 using Et3B (Table 2, entry 1).**

To a solution of nitrone **1** (50 mg, 0.19 mmol) in benzene (5 mL) were added *i*PrI (1.67 mL, 16.8 mmol) and Et3B (1.0 M in hexane, 0.47 mL, 0.47 mmol) at reflux. After being stirred at the same temperature for 30 min, the reaction mixture was concentrated at reduced pressure. Purification of the residue by preparative TLC (hexane/AcOEt 2:1) afforded the desired alkylated product **2b** (35 mg, 60%) as a white solid and the ethylated product **2a** (7 mg, 18%) as a white solid.

**Alkyl radical addition to nitrone 1 using Et3B (Table 2, entries 2-4).**

To a solution of nitrone **1** (50 mg, 0.19 mmol) in RI-benzene (3:1, v/v, 5 mL) was added Et3B (1.0 M in hexane, 0.47 mL, 0.47 mmol) at reflux. After being stirred at the same temperature for 30 min, the reaction mixture was concentrated at reduced pressure. Purification of the residue by preparative TLC (hexane/AcOEt 2:1) afforded the desirably alkylated products **2b-c** as a white solid and the ethylated product **2a** as a white solid.

**2b.** 1H NMR (CDCl3)  7.27-7.14 (10H, m), 5.98 (1H, d, *J*=3.0 Hz), 4.98 (1H, br s), 4.76 (1H, d, *J*=3.0 Hz), 3.63 (1H, d, *J*=3.0 Hz), 2.46 (1H, m), 1.21 (3H, d, *J*=7.0 Hz), 1.15 (3H, d, *J*=7.0 Hz). 13C NMR (CDCl3)  170.0, 135.4, 131.2, 130.7, 128.4, 128.3 (x 2), 127.9, 125.7, 79.2, 70.6, 69.7, 31.0, 19.5, 18.7. HRMS Calcd for C19H21NO3 (M+) 311.1521, Found 311.1530. []D28 +51.6 (*c* 0.61, CHCl3).

**2c.** 1H NMR (CDCl3)  7.11-7.28 (10H, m), 5.94 (1H, d, *J*=3.5 Hz), 4.94 (1H, br s), 4.73 (1H, d, *J*=3.5 Hz), 3.66 (1H, d, *J*=2.5 Hz), 1.16-2.15 (11H, m). 13C NMR (CDCl3)  170.3, 135.4, 131.4, 130.6, 128.4, 128.2, 127.9, 125.8, 79.2, 70.8, 69.8, 41.6, 29.7, 29.5, 26.7 (x 2), 26.2. HRMS Calcd for C22H25NO3 (M+) 351.1833, Found 351.1833. []D28 +19.7 (*c* 0.60, CHCl3).

**2d.** 1H NMR (CDCl3)  7.16-7.27 (10H, m), 6.18 (1H, d, *J*=3.5 Hz), 5.10 (1H, br s), 4.80 (1H, d, *J*=3.5 Hz), 3.68 (1H, d, *J*=5.5 Hz), 2.51-2.60 (1H, m), 1.40-2.08 (8H, m). 13C NMR (CDCl3)  170.6, 136.0, 132.3, 130.4, 128.4, 128.3 (x 2), 27.7, 125.6, 78.3, 69.1, 66.9, 41.5, 30.4, 29.4, 25.4, 24.9. HRMS Calcd for C21H23NO3 (M+) 337.1677, Found 337.1701. []D28 +17.5 (*c* 1.00, CHCl3).

# References

1. R. M. Williams, W. Zhai, D. J. Aldous and S. C. Aldous, *J. Org. Chem.* 1992, **57**, 6527.
2. A. Goti and L. Nannelli, *Tetrahedron Lett.* 1996, **37**, 6025.
3. A. K. Saksena, R. G. Lovey, V. M. Girijavallabhan, A. K. Ganguly and A. T. McPhail, *J. Org. Chem.* 1986, **51**, 5024.
